# Supplementary material for: Novel Bioequivalent Tablet of Solifenacin Succinate Prepared Using Direct Compression Technique for Improved Chemical Stability
Source: MDPI journal article supplement (doi:10.3390/pharmaceutics15061723), 2023-06-14
Supplement: s1 [file s1]

**Supplementary Materials:** The following supporting information can be downloaded from: <https://www.mdpi.com/article/10.3390/pharmaceutics15061723/s1>.

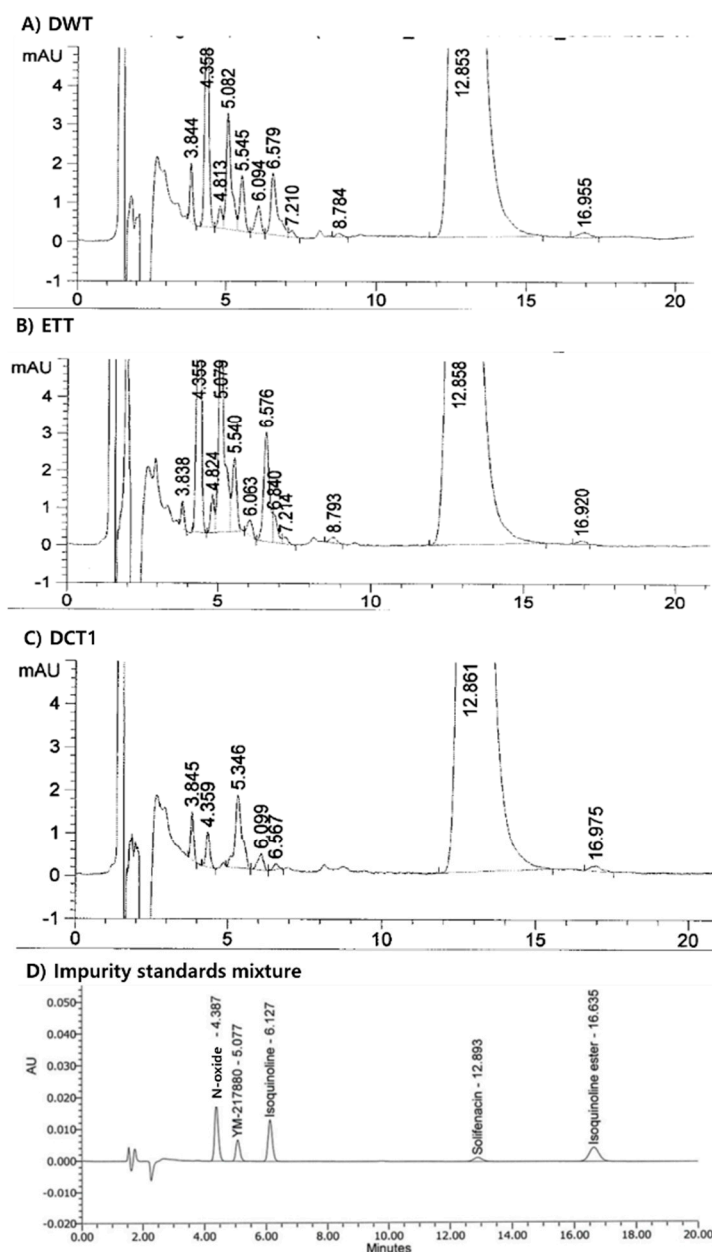

**Figure S1.** HPLC chromatograms of A) DWT, B) ETT, and DCT1 after two weeks of storage under accelerated conditions (40°C, RH75%), and D) pharmaceutical standard mixture of potent degradation products of SOL, such as solifenacin N-oxide, YM217880 ((+)-(R)-quinuclidin-3-yl [2-(2-benzoylphenyl)ethyl]carbamate), isoquinoline ((1S-1-Phenyl-1,2,3,4-tetrahydro-2-isoquinoline), and isoquinoline ester ((1S-ethyl-1-Phenyl-1,2,3,4-tetrahydro-2-isoquinoline carboxylate).

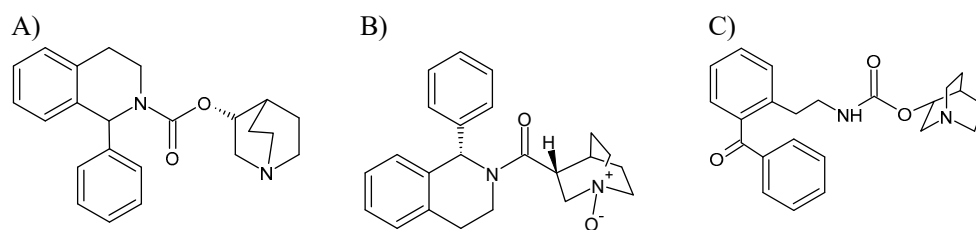

**Figure S2.** Chemical structures of A) SOL, B) solifenacin N-oxide, and C) YM217880 ((+)-(R)-quinuclidin-3-yl [2-(2-benzoylphenyl)ethyl]carbamate), the two major degradation products of the SOL-loaded tablets.

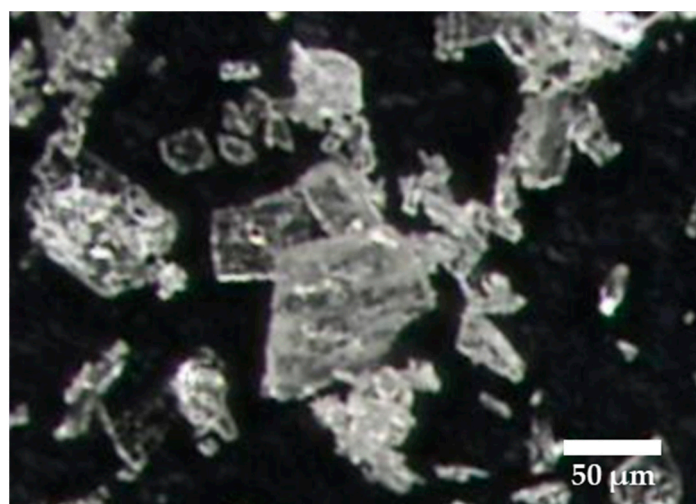

**Figure S3.** Optical microscopy images of the drug powder.
